# Supplementary material for: A 12-immune cell signature to predict relapse and guide chemotherapy for stage II colorectal cancer
Source: publisher site journal article supplement (doi:10.18632/aging.103707), 2020-08-27
Supplement: Supplementary file [file aging-v12i18-103707-supplementary-material-SD1.pdf]

**SUPPLEMENTARY FIGURES**

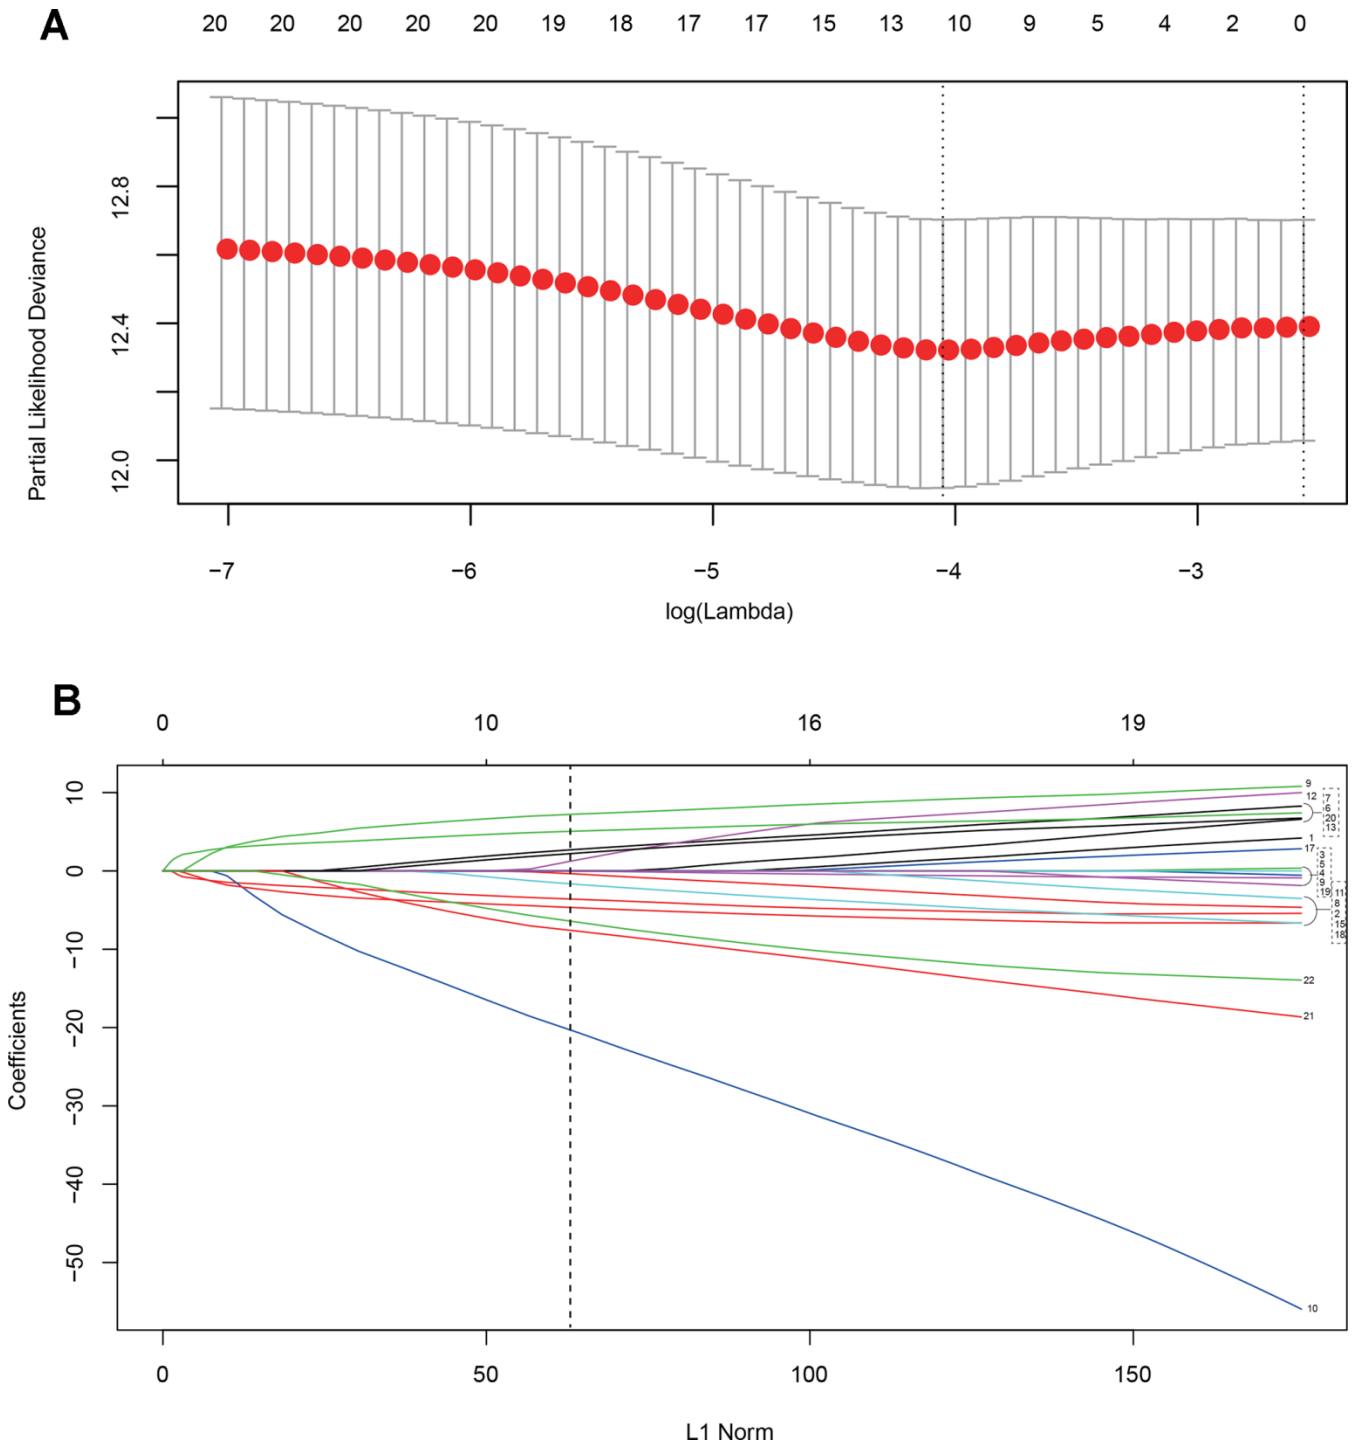

**Supplementary Figure 1. Cross-validation for tuning parameter selection in the LASSO model.** The point plot of partial likelihood deviance versus log (lambda). The red dotted line represents ten-fold cross-validation curve. The solid vertical lines are partial likelihood deviance standard error (SE). The dotted vertical lines are drawn at the optimal values by minimum criteria and 1-SE criteria (A) The trajectory of each candidate immune cell's coefficient in CRC was observed in the LASSO coefficient profiles with the changing of the lambda (B).

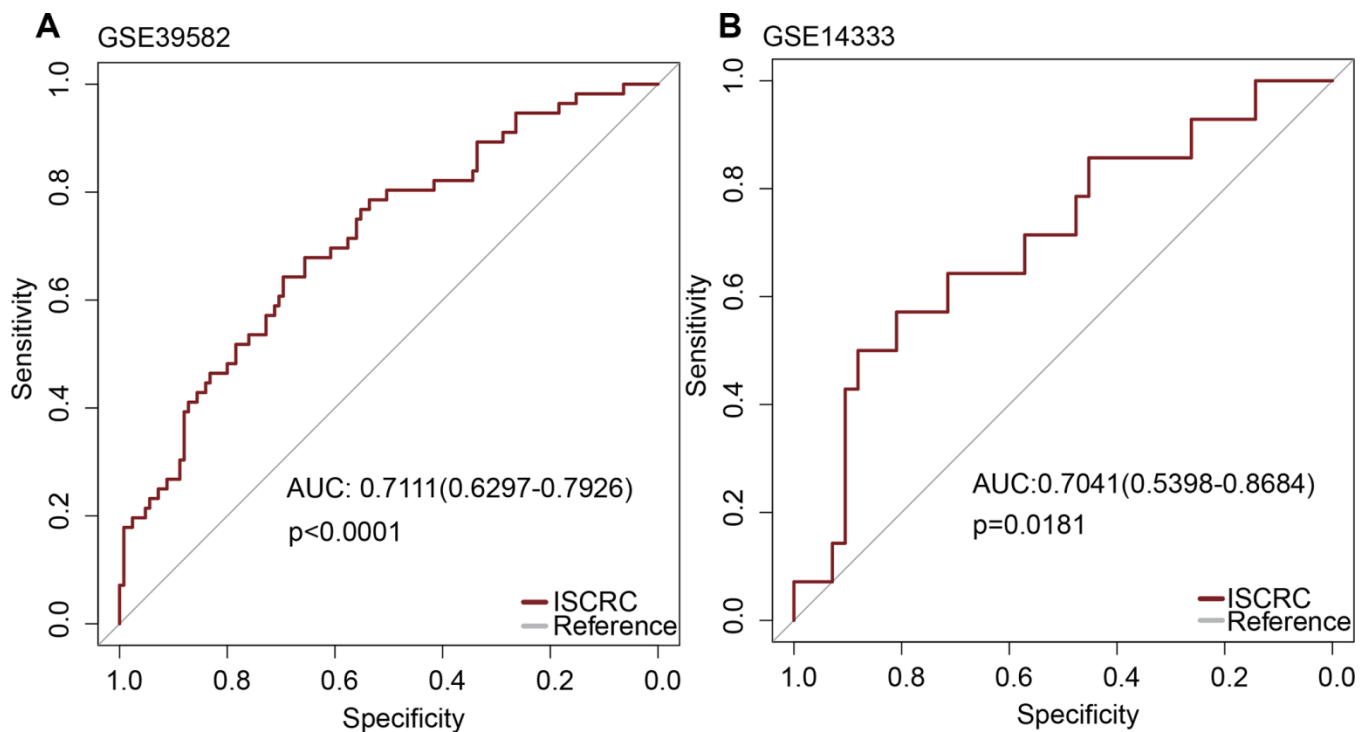

**Supplementary Figure 2. Receiver operating characteristic (ROC) analysis of the ISCRC model.** The sensitivity and specificity of the recurrence prediction in GSE39582 (N=253) (A) and GSE14333 (N=86) (B).

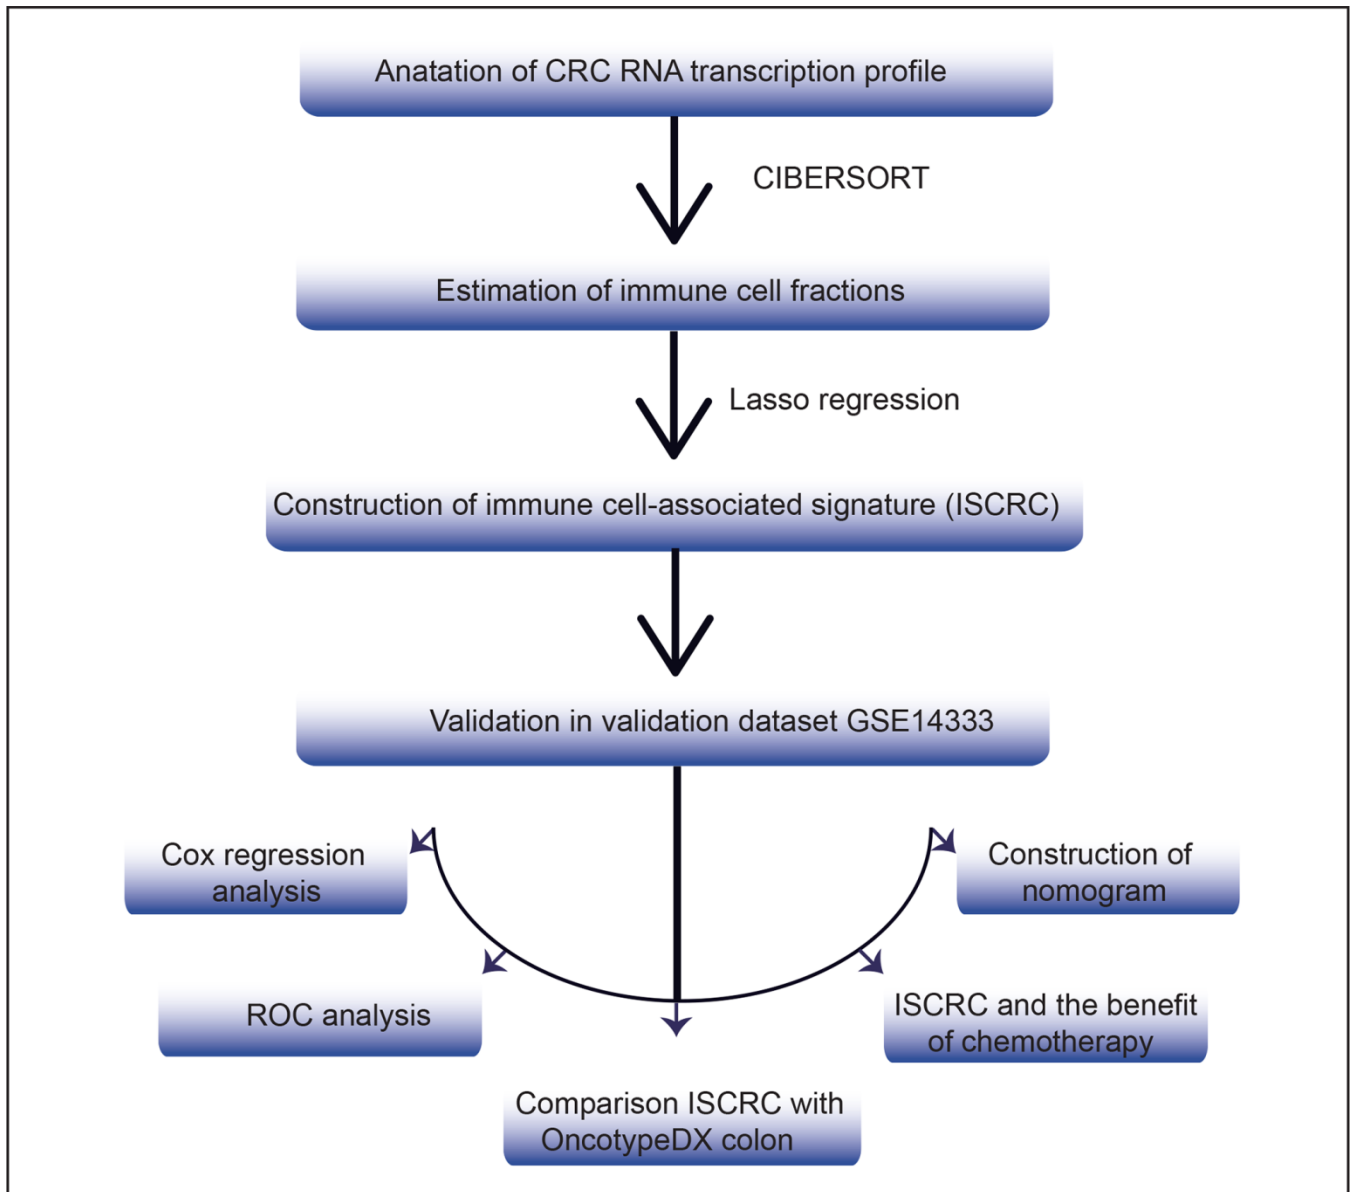

**Supplementary Figure 3. The workflow of this study.** The orders of analyses to generate the ISCRC model and assess its prognostic value in stage II CRC, etc.
