# Supplementary material for: A 12-immune cell signature to predict relapse and guide chemotherapy for stage II colorectal cancer
Source: publisher site journal article supplement (doi:10.18632/aging.103707), 2020-08-27
Supplement: Supplementary file [file aging-v12i18-103707-supplementary-material-SD2.pdf]

## SUPPLEMENTARY TABLES

**Supplementary Table 1. Immune cells significantly associated with the disease-free survival in the training cohort (N=253).**

| <b>Immune cells</b>          | <b>Coefficient</b> |
|------------------------------|--------------------|
| B cells memory               | -3.39085           |
| T cells CD4 memory activated | 2.333988           |
| T cells follicular helper    | -0.10681           |
| T cells regulatory Tregs     | 6.994373           |
| T cells gamma delta          | -18.5763           |
| NK cells activated           | 0.249715           |
| Macrophages M1               | -4.44003           |
| Macrophages M2               | 4.89173            |
| Dendritic cells activated    | -1.24627           |
| Mast cells activated         | 1.840128           |
| Eosinophils                  | -7.01601           |
| Neutrophils                  | -5.69189           |

## Supplementary Table 2. Calculation of prognostic indexes.

### CALCULATION OF PROGNOSTIC INDEX FOR 12-IMMUNE CELL SIGNATURE (ISCRC)

The calculation of the immune risk score for individual patients was based on the multivariate model including all twelve immune cells as shown in table S1. Firstly, through LASSO Cox regression analysis, we have identified 12 prognostic immune cells and their associated coefficients. Then, multiply the fraction of each immune cell by its associated coefficient to generate the value for each immune cell. At last, sum all the values of 12 immune cells to get the immune risk score for each patient. The formula was as follows:

Immune risk score =  $(-3.39085 \times \text{fraction of B cells memory}) + (2.333988 \times \text{fraction of T cells CD4 memory activated}) + (-0.10681 \times \text{fraction of T cells follicular helper}) + (6.994373 \times \text{fraction of T cells regulatory Tregs}) + (-18.5763 \times \text{fraction of T cells gamma delta}) + (0.249715 \times \text{fraction of NK cells activated}) + (-4.44003 \times \text{fraction of Macrophages M1}) + (4.89173 \times \text{fraction of Macrophages M2}) + (-1.24627 \times \text{fraction of Dendritic cells activated}) + (1.840128 \times \text{fraction of Mast cells activated}) + (-7.01601 \times \text{fraction of Eosinophils}) + (-5.69189 \times \text{fraction of Neutrophils})$

### ALGORITHMS TO CALCULATE RISK SCORES FOR ONCOTYEDX

Recurrence Risk score is calculated using the prespecified genes and algorithm [1, 2]:

The O'Connell Recurrence Risk (RS) score is composed of 12 genes among which 5 reference genes and 7 genes associated to recurrence.

For the reference genes, when several probe set were possible, the less variant one was selected.

For the other genes, data were median gene centered and aggregated by mean if several probe sets were available.

Then the recurrence genes intensities for each sample were subtracted by the mean of the reference gene per sample and the formula was applied for each sample.  $RSu = 0.15 * \text{mean}(BGN, FAP, INHBA) - 0.3 * \text{mean}(MKI67, MYC, MYBL2) + 0.15 * GADD45B$

This score was then rescaled  $RS = 44 * (RSu + 0.82)$ .

### REFERENCES

1. Yothers G, O'Connell MJ, Lee M, Lopatin M, Clark-Langone KM, Millward C, Paik S, Sharif S, Shak S, Wolmark N. Validation of the 12-gene colon cancer recurrence score in NSABP C-07 as a predictor of recurrence in patients with stage II and III colon cancer treated with fluorouracil and leucovorin (FU/LV) and FU/LV plus oxaliplatin. *J Clin Oncol*. 2013; 31:4512–9. <https://doi.org/10.1200/JCO.2012.47.3116> PMID:24220557
2. Gray RG, Quirke P, Handley K, Lopatin M, Magill L, Baehner FL, Beaumont C, Clark-Langone KM, Yoshizawa CN, Lee M, Watson D, Shak S, Kerr DJ. Validation study of a quantitative multigene reverse transcriptase-polymerase chain reaction assay for assessment of recurrence risk in patients with stage II colon cancer. *J Clin Oncol*. 2011; 29:4611–9. <https://doi.org/10.1200/JCO.2010.32.8732> PMID:22067390

**Supplementary Table 3. propensity score matching analysis.**

| GSE39852 dataset             |                            |               |        |
|------------------------------|----------------------------|---------------|--------|
| Before Matching              | Stratified by chemotherapy |               | SMD*   |
|                              | 0                          | 1             |        |
| N                            | 198                        | 54            |        |
| Sex (mean (SD))              | 1.40 (0.49)                | 1.41 (0.50)   | 0.007  |
| Age at diagnosis (mean (SD)) | 69.78 (12.62)              | 59.91 (10.47) | 0.851  |
| Tumor location (mean (SD))   | 1.43 (0.50)                | 1.22 (0.42)   | 0.451  |
| After Matching               |                            |               |        |
| After Matching               | Stratified by chemotherapy |               | SMD*   |
|                              | 0                          | 1             |        |
| N                            | 46                         | 27            |        |
| Sex (mean (SD))              | 1.22 (0.42)                | 1.19 (0.40)   | 0.079  |
| Age at diagnosis (mean (SD)) | 66.39 (7.30)               | 65.07 (8.28)  | 0.169  |
| Tumor location (mean (SD))   | 1.11 (0.31)                | 1.11 (0.32)   | 0.008  |
| GSE14333 dataset             |                            |               |        |
| Before Matching              | Stratified by chemotherapy |               | SMD*   |
|                              | 0                          | 1             |        |
| N                            | 64                         | 21            |        |
| Sex (mean (SD))              | 1.42 (0.50)                | 1.62 (0.50)   | 0.396  |
| Age at diagnosis (mean (SD)) | 69.06 (13.20)              | 62.86 (11.28) | 0.505  |
| Tumor location (mean (SD))   | 1.53 (0.50)                | 1.52 (0.51)   | 0.015  |
| After Matching               |                            |               |        |
| After Matching               | Stratified by chemotherapy |               | SMD*   |
|                              | 0                          | 1             |        |
| N                            | 8                          | 8             |        |
| Sex (mean (SD))              | 1.62 (0.52)                | 1.62 (0.52)   | <0.001 |
| Age at diagnosis (mean (SD)) | 71.75 (8.26)               | 70.62 (8.52)  | 0.134  |
| Tumor location (mean (SD))   | 1.75 (0.46)                | 1.75 (0.46)   | <0.001 |

\*SMD is short for Standardized Mean Differences.
